# Supplementary material for: Interventional nuclear medicine: “click” chemistry as an in vivo targeting strategy for imaging microspheres and bacteria
Source: Royal Society of Chemistry journal article supplement (doi:10.1039/d0bm01823f), 2021-01-01
Supplement: d0bm01823f1.pdf [file d0bm01823f1.pdf]

**Interventional Nuclear Medicine: “click” chemistry as an in vivo targeting strategy for  
imaging microspheres and bacteria**

**Supporting Information**

Page 2: Schematic depiction of  $^{111}\text{In}$ -DTPA-DBCO (**Fig. S1A**) &  $^1\text{H}$  NMR spectrum of DTPA-  
DBCO (**Fig. S1B**)

Page 3: Radio-HPLC (**Fig. S2**)

Page 4: Fluorescence imaging (**Fig. S3**)

Page 5: Biodistribution (**Table S1**)

Page 6: Biodistribution (**Table S2**)

**Fig S1A.** Schematic depiction of  $^{111}\text{In}$ -DTPA-DBCO

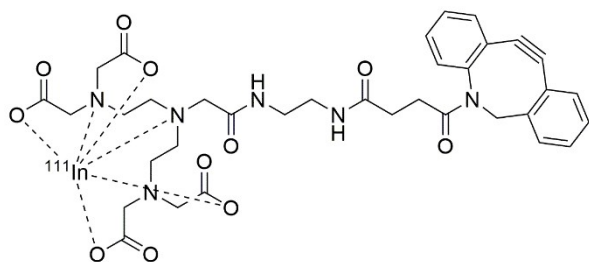

**Fig S1B.**  $^1\text{H}$ -NMR of DTPA-DBCO

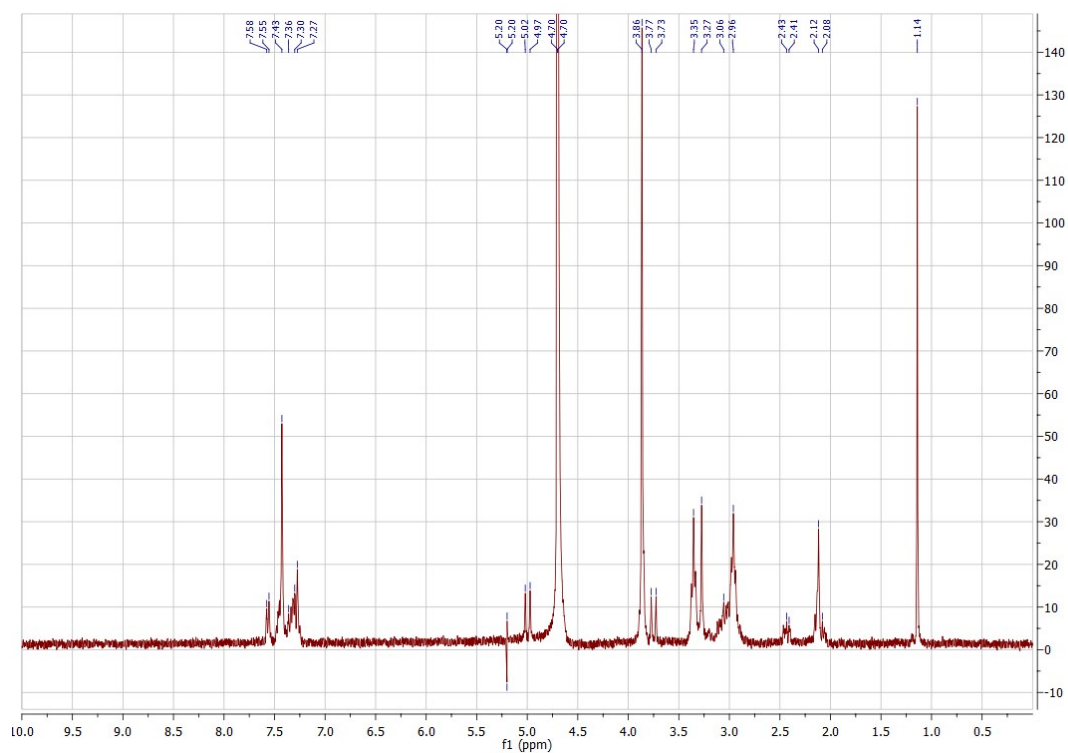

## Radio-HPLC

Fig S2

A)

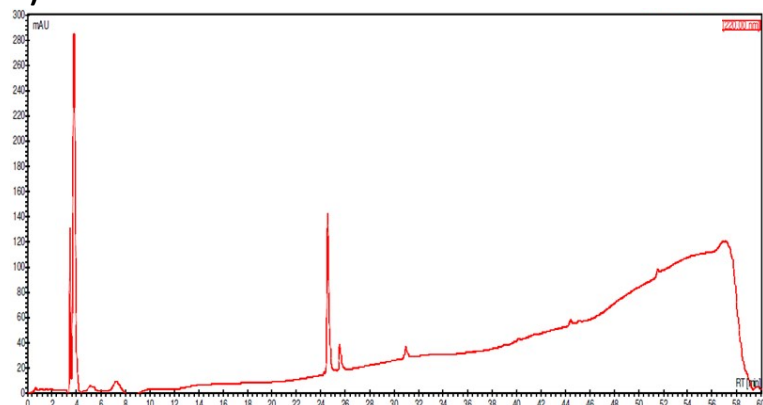

B)

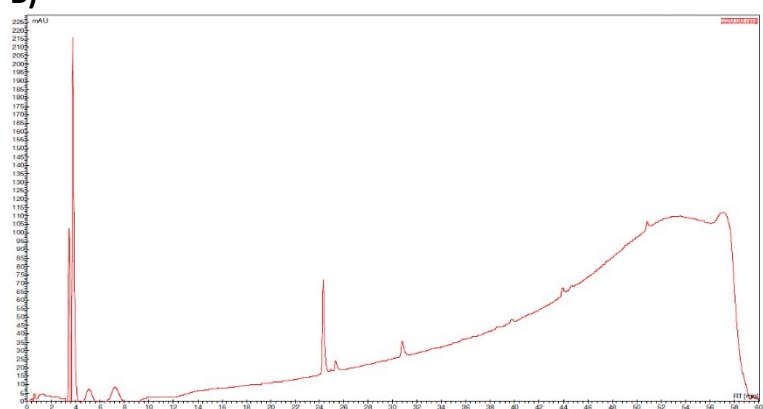

C)

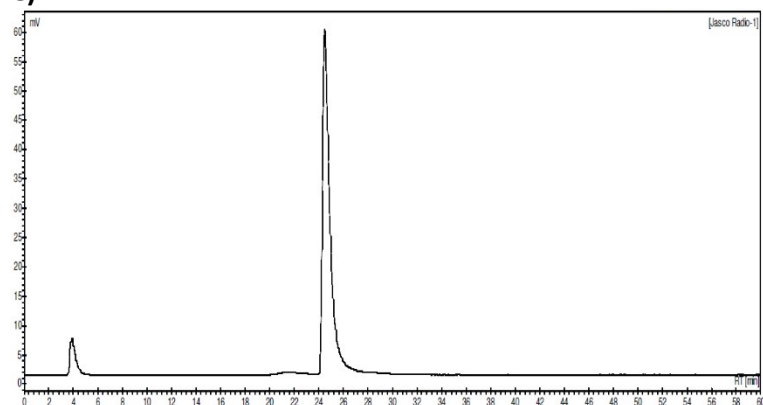

**Fig S2.** Evaluation of radiochemical purity of the  $^{111}\text{In}$ -DTPA-DBCO tracer by Radio-HPLC analysis. (A) Of unlabeled DTPA-DBCO (UV signal 220 nm) the retention time,  $t_{\text{Ret}} = 24.6$  min, (B)  $^{111}\text{In}$ -DTPA-DBCO (UV signal 220 nm) retention  $t_{\text{Ret}} = 24.2$  min and (C) (radioactivity signal, RA)  $^{111}\text{In}$ -DTPA-DBCO elutes as a single peak ( $t_{\text{Ret}} = 24.5$  min) with less 5% presence of free  $^{111}\text{In}$  ( $t_{\text{Ret}} = 3.9$  min).

## Fluorescence imaging

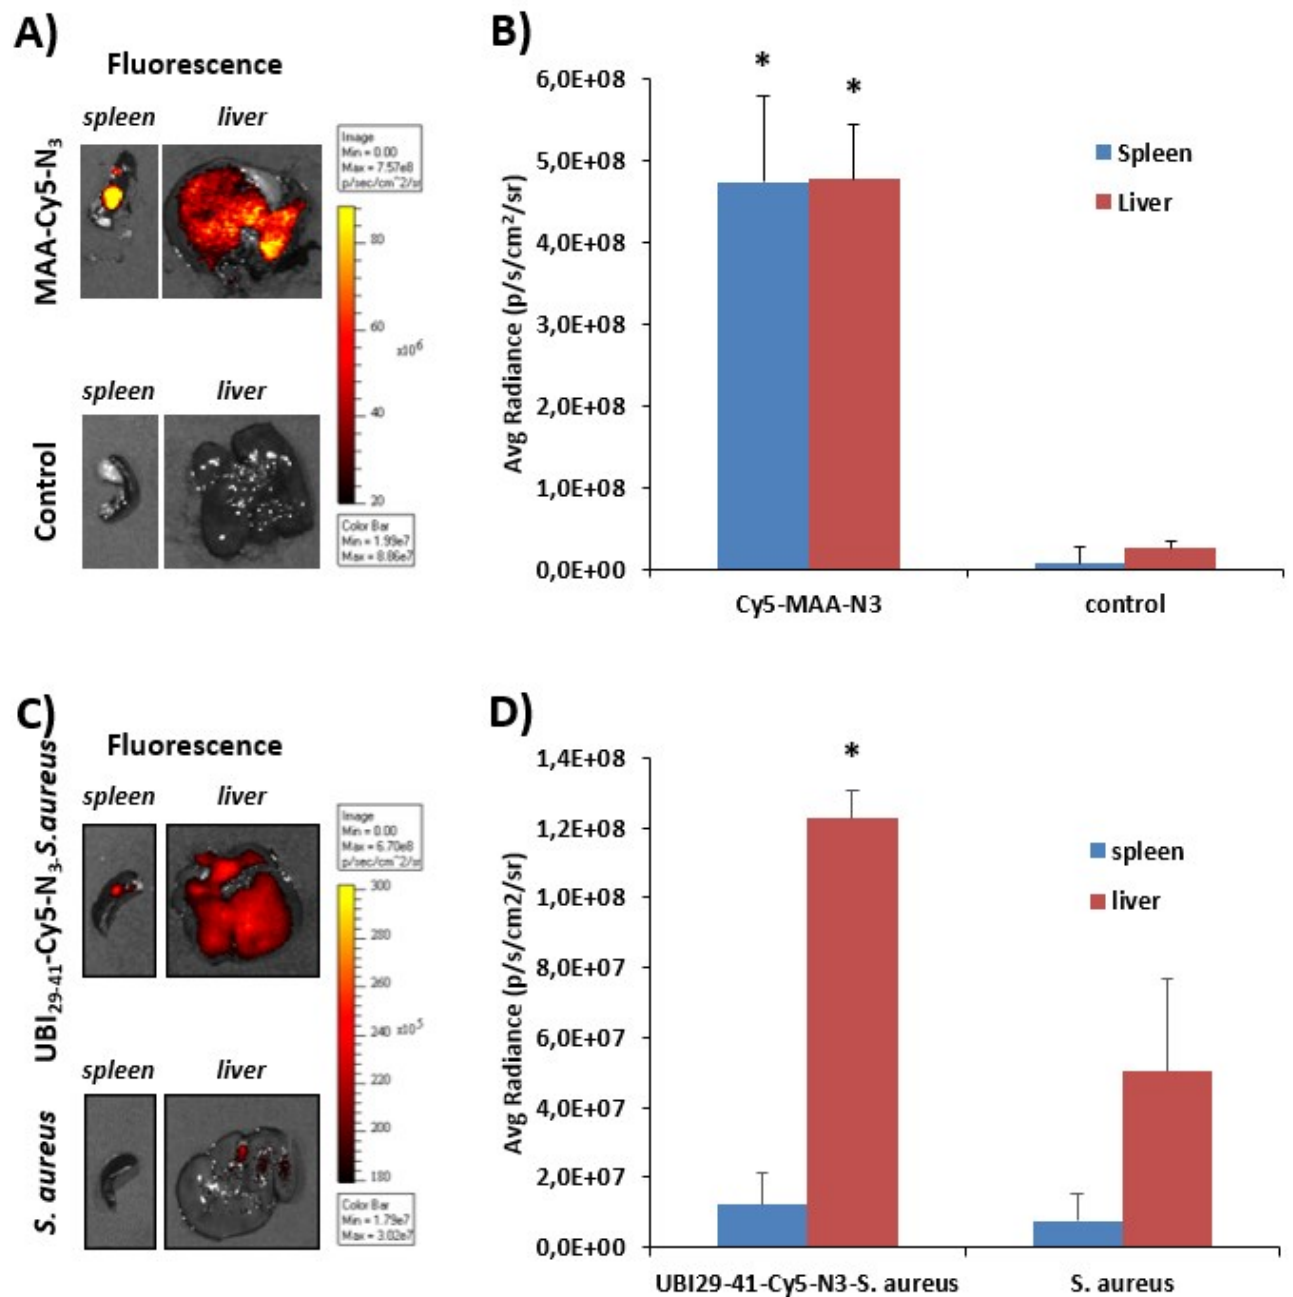

**Fig S3.** *Ex vivo* fluorescent imaging with IVIS of murine liver and spleen after pretargeting with <sup>99m</sup>Tc-MAA-Cy5-N<sub>3</sub>. The scale bar indicates the intensity of fluorescence expressed as photons/s/cm<sup>2</sup>. Representative fluorescent images of **A)** <sup>99m</sup>Tc-MAA-Cy5-N<sub>3</sub> or **C)** <sup>99m</sup>Tc-UBI<sub>29-41</sub>-Cy5-N<sub>3</sub> in the spleen and diffusion to the liver in excised tissues at 20 h after intrasplenic administration. Quantification of the fluorescent signal of **B)** <sup>99m</sup>Tc-MAA-Cy5-N<sub>3</sub> or **D)** <sup>99m</sup>Tc-UBI<sub>29-41</sub>-Cy5-N<sub>3</sub>-S. aureus in the spleen (blue bars) or liver (red bars) in excised tissues at 20 h after intrasplenic administration. Data are expressed as the mean ± SD Average Radiance (p/s/cm<sup>2</sup>/sr) were calculated based on the photon counts measured in the tissues of 3 mice. The significance of difference ( $p < 0.05$ ) is indicated with \* = compared to control (no MAA) or unlabeled *S. aureus* according to Student's T-test.

## Biodistribution

**Table S1:** The bio-distribution of intravenously (I.V.) administered  $^{111}\text{In}$ -DTPA-DBCO after hepatic pre-targeting with  $^{99\text{m}}\text{Tc}$ -Cy5-MAA- $\text{N}_3$ . Data (expressed as the mean of the percentage of the injected dose per gram tissue (%ID/g) of 3-5 observations were calculated based on the radioactive counts measured in various tissues at 20 h ( $^{111}\text{In}$ -DTPA-DBCO) post-injection of the radioactive DBCO tracer. The significance of difference ( $p < 0.05$ ) is indicated with \* compared to non-pre-targeted mice according to Student's T-test.

| Tissue             | $^{111}\text{In}$ -DTPA-DBCO (I.V.)<br>%ID/g |                       |
|--------------------|----------------------------------------------|-----------------------|
|                    | Control (no MAA)                             | Cy5-MAA- $\text{N}_3$ |
| Blood              | 0.21 ± 0.03                                  | 0.25 ± 0.02*          |
| Thyroid gland      | 1.22 ± 1.13                                  | 1.08 ± 0.21           |
| Salivary gland     | 0.79 ± 0.30                                  | 0.95 ± 0.29           |
| Heart              | 0.46 ± 0.16                                  | 0.60 ± 0.16           |
| Lungs              | 0.41 ± 0.07                                  | 0.68 ± 0.25*          |
| Urine & bladder    | 1.49 ± 0.81                                  | 1.87 ± 1.68           |
| Liver              | 3.45 ± 0.52                                  | 7.46 ± 1.49*          |
| Spleen             | 0.60 ± 0.16                                  | 0.95 ± 0.30*          |
| Kidneys            | 7.44 ± 2.23                                  | 10.23 ± 2.95          |
| Stomach            | 1.64 ± 1.78                                  | 0.83 ± 1.07           |
| Intestines         | 0.85 ± 0.55                                  | 1.37 ± 1.35           |
| Muscle             | 0.26 ± 0.04                                  | 0.43 ± 0.14*          |
| Brains             | 0.03 ± 0.01                                  | 0.03 ± 0.01           |
| Excreted (%ID)     | 85.54 ± 3.48                                 | 80.08 ± 5.88          |
| Liver-muscle ratio | 13.37 ± 2.83                                 | 18.47 ± 5.63          |
| Liver-blood ratio  | 16.76 ± 3.28                                 | 29.81 ± 6.86*         |

**Table S2:** The bio-distribution of intravenously (I.V.) administered radiolabeled vector [<sup>111</sup>In]In-DTPA-DBCO after hepatic pre-targeting with <sup>99m</sup>Tc-UBI<sub>29-41</sub>-Cy5-N<sub>3</sub>-labeled-*S. aureus* in mice. Data are expressed as the mean of the percentage of the injected dose per gram tissue (%ID/g, n=6) and were calculated based on the radioactive counts measured in various tissues at 4 h post-injection of the host vector. \* = *p* < 0.05 compared to non-labeled *S. aureus* in mice.

| Tissue             | <sup>111</sup> In-DTPA-DBCO (I.V.)<br>%ID/g |                                                                     |
|--------------------|---------------------------------------------|---------------------------------------------------------------------|
|                    | <i>S. aureus</i>                            | UBI <sub>29-41</sub> -Cy5-N <sub>3</sub> -labeled- <i>S. aureus</i> |
| Blood              | 0.09 ± 0.02                                 | 0.09 ± 0.01                                                         |
| Thyroid gland      | 0.39 ± 0.03                                 | 0.64 ± 0.19                                                         |
| Salivary gland     | 0.42 ± 0.09                                 | 0.55 ± 0.12                                                         |
| Heart              | 0.21 ± 0.06                                 | 0.29 ± 0.05                                                         |
| Lungs              | 0.23 ± 0.02                                 | 0.25 ± 0.08                                                         |
| Urine & bladder    | 0.43 ± 0.11                                 | 0.42 ± 0.29                                                         |
| Liver              | 5.99 ± 0.53                                 | 9.34 ± 1.26*                                                        |
| Spleen             | 0.44 ± 0.16                                 | 0.42 ± 0.35                                                         |
| Kidneys            | 3.87 ± 0.32                                 | 8.44 ± 4.45                                                         |
| Stomach            | 0.73 ± 0.56                                 | 1.34 ± 1.38                                                         |
| Intestines         | 1.36 ± 0.83                                 | 1.71 ± 0.44                                                         |
| Thigh muscle       | 0.17 ± 0.01                                 | 0.22 ± 0.03                                                         |
| Brains             | 0.01 ± 0.01                                 | 0.02 ± 0.01                                                         |
| Excreted (%ID)     | 90.05 ± 0.77                                | 88.55 ± 2.3                                                         |
| Liver-muscle ratio | 36.02 ± 3.04                                | 43.65 ± 10.69                                                       |
| Liver-blood ratio  | 72.55 ± 17.31                               | 108.64 ± 20.96                                                      |
